# Supplementary material for: Cu-Doped Sr2Fe1.5Mo0.5O6−δ as a highly active cathode for solid oxide electrolytic cells
Source: Royal Society of Chemistry journal article supplement (doi:10.1039/c9cc03455b), 2019-01-01
Supplement: c9cc03455b1.pdf [file c9cc03455b1.pdf]

## Supplementary Information

### **Cu-doped $\text{Sr}_2\text{Fe}_{1.5}\text{Mo}_{0.5}\text{O}_{6-\delta}$ as a highly active cathode for solid oxide electrolytic cells**

Chuming Xu,<sup>a</sup> Shuying Zhen,<sup>\*a</sup> Rongzheng Ren,<sup>a</sup> Haosen Chen,<sup>b</sup> Weili Song,<sup>b</sup> Zhenhua Wang,<sup>a</sup> Wang Sun,<sup>\*a</sup> and Kening Sun,<sup>\*a</sup>

<sup>a</sup> *Beijing Key Laboratory for Chemical Power Source and Green Catalysis, School of Chemistry and Chemical engineering, Beijing Institute of Technology, Beijing, 100081, China.*

<sup>b</sup> *Institute of Advanced Structure Technology, Beijing Institute of Technology, 100081, Beijing, China.*

---

\* Corresponding author. Tel./ fax: +86-010-68918696.

E-mail address: zhensy@bit.edu.cn (Shuying Zhen); sunwang@bit.edu.cn (Wang Sun); bitkeningsun@163.com (Kening Sun).

## Experimental procedure

$\text{Sr}_2\text{Fe}_{1.5}\text{Mo}_{0.5}\text{O}_{6-\delta}$  (SFM) and  $\text{Sr}_2\text{Fe}_{1.3}\text{Cu}_{0.2}\text{Mo}_{0.5}\text{O}_{6-\delta}$  (SFCM) powders were synthesized by using the combustion method<sup>1</sup>. Briefly, stoichiometric quantities of  $\text{Sr}(\text{NO}_3)_2$ ,  $\text{Fe}(\text{NO}_3)_3 \cdot 9\text{H}_2\text{O}$ ,  $\text{Cu}(\text{NO}_3)_2 \cdot 5\text{H}_2\text{O}$  and  $(\text{NH}_4)_6\text{Mo}_7\text{O}_{24} \cdot 4\text{H}_2\text{O}$  metal salts were dissolved in an appropriate amount of deionized water and a certain proportion of citric acid. Then, glycine was added as a combustion promoter. The clarified solution was stirred in a water bath at 80 °C until it attained a sol-gel form and, then, the combustion was carried out in an oven at 250 °C for 1 h. After combustion, the as-received powder was ground and calcined in a muffle furnace at 950 °C for 4 h in air.

The crystal structure and phase analysis were performed by using X-ray diffractometer (XRD, Panalytical X'Pert Pro). The XRD data were analyzed by using the Rietveld refinement with GSAS program and EXPGUI interface. The microstructure of the as-prepared powders was observed by scanning electron microscopy (SEM, FEI QUANTA-250). The chemical composition and oxidation states of different atoms were analyzed by X-ray photoelectron spectroscopy (XPS, MULTILAB2000, VG). The electrical conductivity was measured by using a Keithley 2400 source meter, following a four-probe method in a mixture of CO and CO<sub>2</sub> (1:1 v/v). Electrical conductivity relaxation (ECR) method was utilized to characterize the CO-CO<sub>2</sub> reactions, at 750 °C, with a digital multimeter (2400, Keithley) by using the four-point technique.<sup>2</sup> Moreover, surrounding atmosphere switching from 33%CO<sub>2</sub>-67%CO to 50%CO<sub>2</sub>-50%CO at a flow rate of 100 mL min<sup>-1</sup>. The schematic diagram of the ECR experiment is presented in Fig. S6. CO<sub>2</sub>-temperature programmed desorption (TPD) experiments were carried out by using a micromeritics apparatus (Chembet Pulsar TPR/TPD).

The electrochemical performance was measured by using LSGM ( $\text{La}_{0.9}\text{Sr}_{0.1}\text{Ga}_{0.8}\text{Mg}_{0.2}\text{O}_3$ , Fuel Cell, USA), as the electrolyte, GDC ( $\text{Ce}_{0.8}\text{Gd}_{0.2}\text{O}_{1.9}$ , Fuel Cell, USA), as the barrier layer, and  $\text{La}_{0.6}\text{Sr}_{0.4}\text{Fe}_{0.8}\text{Co}_{0.2}\text{O}_3$  (LSFC, Fuel Cell, USA), as the anode. The electrochemical properties were assessed by assembling (GDC/SFCM)|LSGM|(GDC/SFCM) symmetrical cells and (SFCM/GDC)|LSGM| LSCF single-cell. Herein, the electrode materials were prepared by screen

printing and sintered at 900 °C for 2 h. Electrochemical impedance spectroscopy (EIS) was carried out by using the symmetrical cell in CO/CO<sub>2</sub> mixture. The electrochemical workstation (Autolab 302N), with an AC amplitude of 10 mV, was used to collect EIS spectra, in the frequency range of 0.01 to 100 kHz, and *I-V* characteristics of a single-cell.

### Oxygen ion transfer properties

The chemical bulk diffusion coefficient ( $D_{chem}$ ) and surface exchange coefficient ( $k_{chem}$ ) were obtained by fitting the electrical conductivity relaxation curves with Eq. (S1 and S2).

$$f(t) = \frac{\sigma(t) - \sigma(0)}{\sigma(\infty) - \sigma(0)} \quad (S1)$$

$$f(t) = 1 - \sum_{m=1}^{\infty} \sum_{n=1}^{\infty} \sum_{l=1}^{\infty} \frac{2L_x^2 \exp(-\frac{\alpha_m^2 D_{chem} t}{x^2})}{\alpha_m^2 (\alpha_m^2 + L_x^2 + L_x)} \times \frac{2L_y^2 \exp(-\frac{\beta_n^2 D_{chem} t}{y^2})}{\beta_n^2 (\beta_n^2 + L_y^2 + L_y)} \times \frac{2L_z^2 \exp(-\frac{\gamma_l^2 D_{chem} t}{z^2})}{\gamma_l^2 (\gamma_l^2 + L_z^2 + L_z)} \quad (S2)$$

where  $f(t)$  refers to the normalized conductivity, while  $\sigma(0)$ ,  $\sigma(t)$  and  $\sigma(\infty)$  represent the initial, time-dependent and final conductivity, respectively. Eq. (S3) presents the calculation process of parameters

$$L_x, L_y \text{ and } L_z. \quad L_x = x \frac{k_{chem}}{D_{chem}}, L_y = y \frac{k_{chem}}{D_{chem}}, L_z = z \frac{k_{chem}}{D_{chem}} \quad (S3)$$

Herein,  $\alpha_m$ ,  $\beta_n$  and  $\gamma_l$  represent the  $m^{th}$ ,  $n^{th}$  and  $l^{th}$  positive root of the transcendental Eq. (S4), respectively.

$$\alpha_m \tan \alpha_m = L_x, \beta_n \tan \beta_n = L_y, \gamma_l \tan \gamma_l = L_z \quad (S4)$$

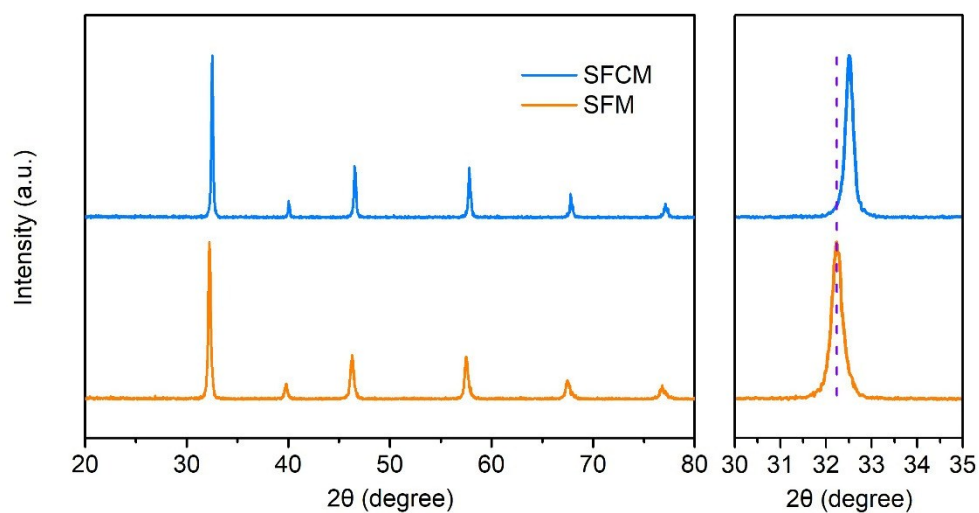

**Fig. S1** XRD patterns of SFM and SFCM powders, calcined at 950 °C for 4 h.

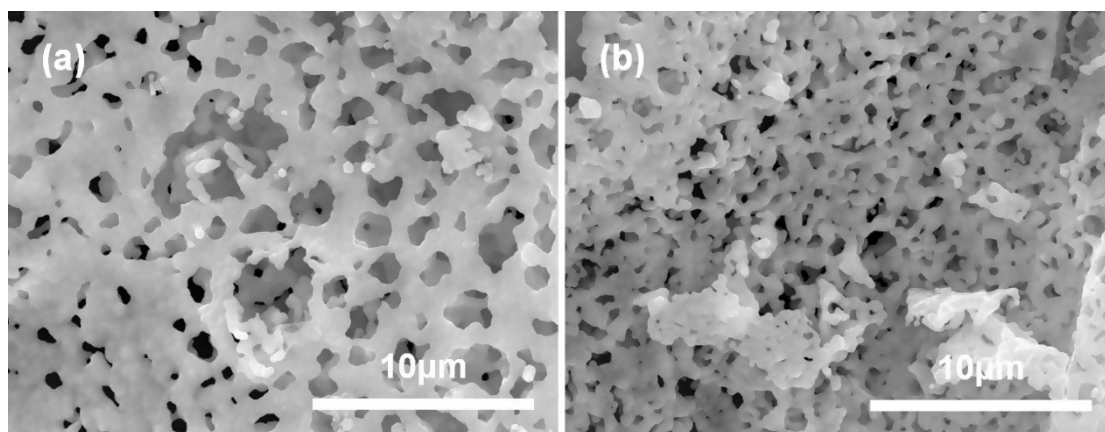

**Fig. S2** SEM images of (a) SFCM and (b) SFM powders.

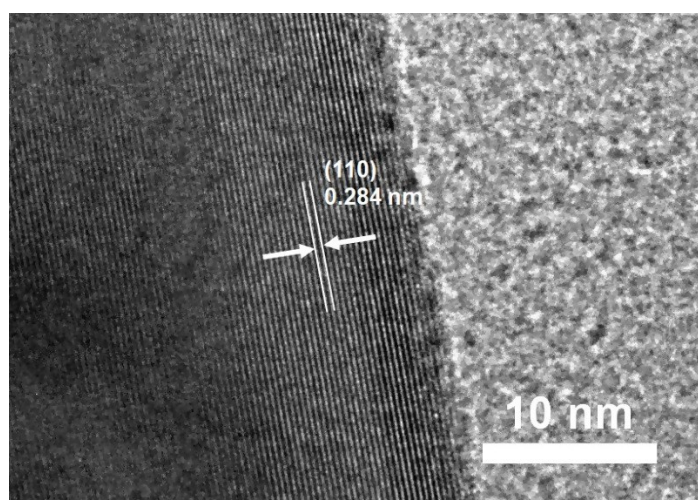

**Fig. S3** HRTEM images of SFM powder.

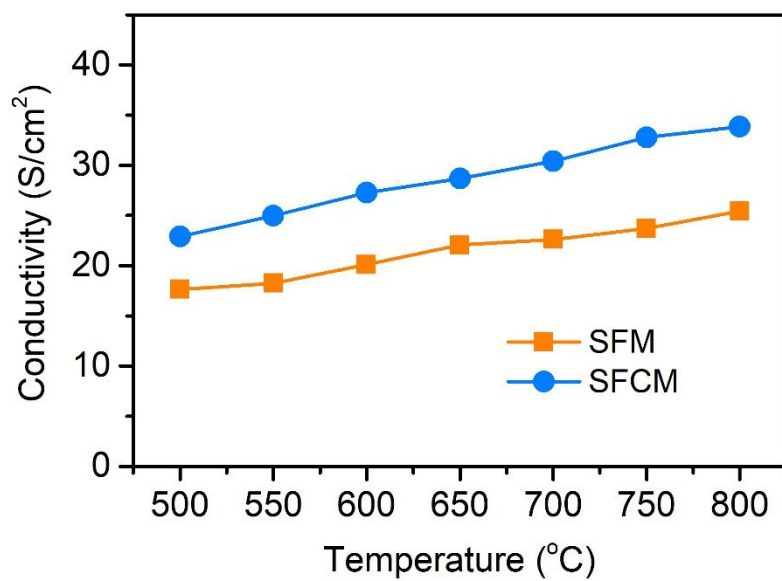

**Fig. S4** Temperature-dependent electronic conductivity of SFCM and SFM samples, measured in the temperature range of 500 to 800 °C under CO/CO<sub>2</sub> environment (1:1 v/v).

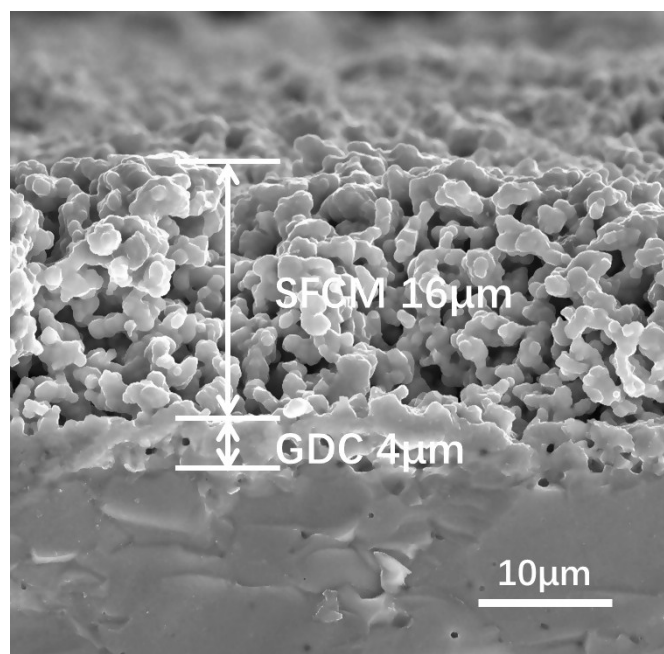

**Fig. S5** Cross-sectional SEM image of the single-cell with SFCM cathode.

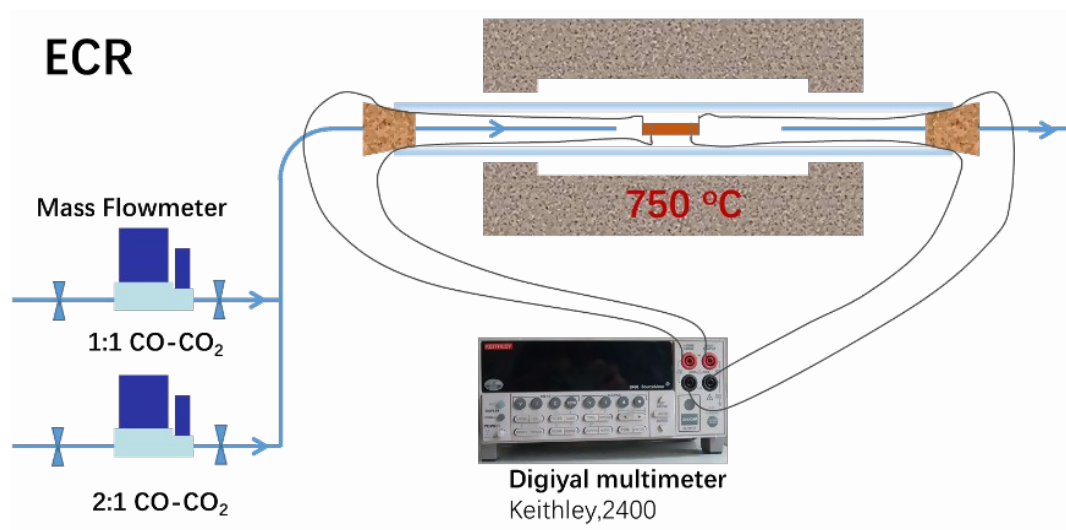

**Fig. S6** Schematic illustration of the ECR measurement system.

**Table S1** Comparison of the electrolysis current density, measured at 800 °C and 1.5 V, by using different cathode materials, including single-phase oxides and oxide-based composites.

| Fuel<br>electrode | Feeding gas            | Electrolyte//Oxygen<br>electrode | Current<br>density (A<br>cm <sup>-2</sup> ) | Ref.      |
|-------------------|------------------------|----------------------------------|---------------------------------------------|-----------|
| LSFT              | CO <sub>2</sub>        | YSZ//LSFT                        | 0.28                                        | 3         |
| LSFN              | CO <sub>2</sub> -30%CO | YSZ//LSCF-GDC                    | 0.75                                        | 4         |
| LCFN              | CO <sub>2</sub> -50%CO | YSZ//LSM-YSZ                     | 0.87                                        | 5         |
| Ce-LSCrF          | CO <sub>2</sub> -30%CO | YSZ//LSCF                        | 0.9                                         | 6         |
| F-SFM             | CO <sub>2</sub>        | LSGM//LSCF-SDC                   | 1.36                                        | 7         |
| GDC- SFM          | CO <sub>2</sub>        | YSZ// LSM-YSZ                    | 0.5                                         | 8         |
| SFCM              | CO <sub>2</sub>        | LSGM//LSCF-GDC                   | 1.45                                        | This work |

LSM = La(Sr)MnO<sub>3+δ</sub>, SDC = Ce(Sm)O<sub>2-δ</sub>, LSFT = La<sub>0.3</sub>Sr<sub>0.7</sub>Fe<sub>0.7</sub>Ti<sub>0.3</sub>O<sub>3+δ</sub>, LSFN = La<sub>0.6</sub>Sr<sub>0.4</sub>Fe<sub>0.8</sub>Ni<sub>0.2</sub>O<sub>3-δ</sub>, LCFN = La<sub>0.9</sub>Ca<sub>0.1</sub>Fe<sub>0.9</sub>Nb<sub>0.1</sub>O<sub>3-δ</sub>, GDC = Ce(Gd)O<sub>2-δ</sub>, LSTM = La<sub>0.2</sub>Sr<sub>0.8</sub>Ti<sub>0.9</sub>Mn<sub>0.1</sub>O<sub>3-δ</sub>, Ce-LSCrF = La<sub>0.65</sub>Ce<sub>0.05</sub>Sr<sub>0.3</sub>Cr<sub>0.5</sub>Fe<sub>0.5</sub>O<sub>3-δ</sub>, F-SFM = Sr<sub>2</sub>Fe<sub>1.5</sub>Mo<sub>0.5</sub>O<sub>6-δ</sub>F<sub>0.1</sub>, SFM = Sr<sub>2</sub>Fe<sub>1.5</sub>Mo<sub>0.5</sub>O<sub>6-δ</sub>.

**Table S2.** Summary of Rietveld refinement results of  $\text{Sr}_2\text{Fe}_{1.5}\text{Cu}_{0.2}\text{Mo}_{0.5}\text{O}_{6-\delta}$ .

| Sample          | $\text{Sr}_2\text{Fe}_{1.5}\text{Cu}_{0.2}\text{Mo}_{0.5}\text{O}_{6-\delta}$ |
|-----------------|-------------------------------------------------------------------------------|
| Space group     | Pnma                                                                          |
| Cell parameters | $a = 5.538$                                                                   |
|                 | $b = 7.850$                                                                   |
|                 | $c = 5.553$                                                                   |
|                 | $\alpha = \beta = \gamma = 90^\circ$                                          |
|                 | Density = $5.330 \text{ g}\cdot\text{cm}^{-3}$                                |
| Riveted         | $R_p = 4.87\%$                                                                |
| Refinement      | $R_{wp} = 7.85\%$                                                             |
| Parameters      | $\chi^2 = 1.961$                                                              |

## References

1. M. Hou, W. Sun, P. Li, J. Feng, G. Yang, J. Qiao, Z. Wang, D. Rooney, J. Feng and K. Sun, *Journal of Power Sources*, 2014, **272**, 759-765.
2. M. Zheng, W. Shuang, L. Mei and C. Xia, *Journal of Power Sources*, 2017, **345**, 165-175.
3. Z. Cao, B. Wei, J. Miao, Z. Wang, Z. Lü, W. Li, Y. Zhang, X. Huang, X. Zhu, Q. Feng and Y. Sui, *Electrochemistry Communications*, 2016, **69**, 80-83.
4. S. Liu, Q. Liu and J.-L. Luo, *Journal of Materials Chemistry A*, 2017, **5**, 2673-2680.
5. L. Liu, X. Zhou, Y. Wang, S. Li, R. Yin, X. Ji, X. Zhao and B. Li, *Electrochimica Acta*, 2017, **236**, 371-377.
6. Y. Zhang, J. Li, Y. Sun, B. Hua and J. L. Luo, *Acs Applied Materials & Interfaces*, 2016, **8**, 6457.
7. Y. Li, Y. Li, Y. Wan, Y. Xie, J. Zhu, H. Pan, X. Zheng and C. Xia, *Advanced Energy Materials*, 2019, **9**, 1803156.
8. H. Lv, Y. Zhou, X. Zhang, Y. Song, Q. Liu, G. Wang and X. Bao, *Journal of Energy Chemistry*, 2019, **35**, 71-78.
